# Supplementary material for: ‘Cervified’: a method for the morphometric identification of red deer (Cervus elaphus), fallow deer (Dama dama), and roe deer (Capreolus capreolus) archaeological bones
Source: Research Square preprint supplement (doi:10.21203/rs.3.rs-6636241/v1), 2025-05-16
Supplement: Supplementary file 1 [file 9e97cb6d21ca192ad7e24f3a.pdf]

**Title:** ‘Cervified’: a method for the morphometric identification of red deer (*Cervus elaphus*), fallow deer (*Dama dama*), and roe deer (*Capreolus capreolus*) archaeological bones.

**Journal name:** Journal of Archaeological Method and Theory

**Authors:** Veronica Aniceti<sup>1\*</sup>, Mauro Rizzetto<sup>2\*</sup>, Francesco Giacalone<sup>3</sup>

<sup>1</sup> Corresponding author. Consejo Superior de Investigaciones Científicas, Institució Milà i Fontanals (CSIC-IMF), Barcelona, Spain; [veronica.aniceti@imf.csic.es](mailto:veronica.aniceti@imf.csic.es)

<sup>2</sup> Corresponding author. Vrije Universiteit Brussel, Interdisciplinary Historical Food Studies research group (VUB-FOST), Brussels, Belgium; [mauro.rizzetto@vub.be](mailto:mauro.rizzetto@vub.be)

<sup>3</sup> Ludwig.guru, Palermo, Italy

\* These authors contributed equally to this work.

## Online Resource 5

Results of Principal Component Analysis (PCA) run on shape indices.

| Element/zone                        | Shape indices                                                                 |
|-------------------------------------|-------------------------------------------------------------------------------|
| scapula                             | ASG/LG, ASG/GLP, SLC/GLP                                                      |
| distal humerus                      | BT/Bd, HTC/BT, HX/BT, HTL/BT, HTC/Bd, HX/Bd, HTL/Bd, HTC/HX, HTL/HTC, HTL/HC  |
| proximal radius (without V indices) | BFp/Bp, Dp/Bp, Dp/BFp                                                         |
| proximal radius (with V indices)    | BFp/Bp, Dp/Bp, Dp/BFp, V/Bp, V/BFp, V/Dp                                      |
| distal tibia                        | Ddb/Dda, Dda/Bd, Ddb/Bd                                                       |
| astragalus                          | GLm/GLl, Bd/H, Dl/GLl, Dl/H                                                   |
| calcaneum (mature)                  | Bd/Dd, c/d, B/c, B/d                                                          |
| calcaneum (immature)                | c/d, B/c, B/d                                                                 |
| distal metapodials                  | b/a, a/BFd, b/BFd, a/1, a/2, a/3, 1/2, 1/3, 3/2, b/4, b/5, b/6, 4/5, 4/6, 6/5 |

Table 1. Lists of shape indices used in the Principal Component Analysis (PCA) for each element/zone. The PCA for the proximal radius was calculated both excluding and including shape indices using the measurement V, which is only taken for red deer and fallow deer.

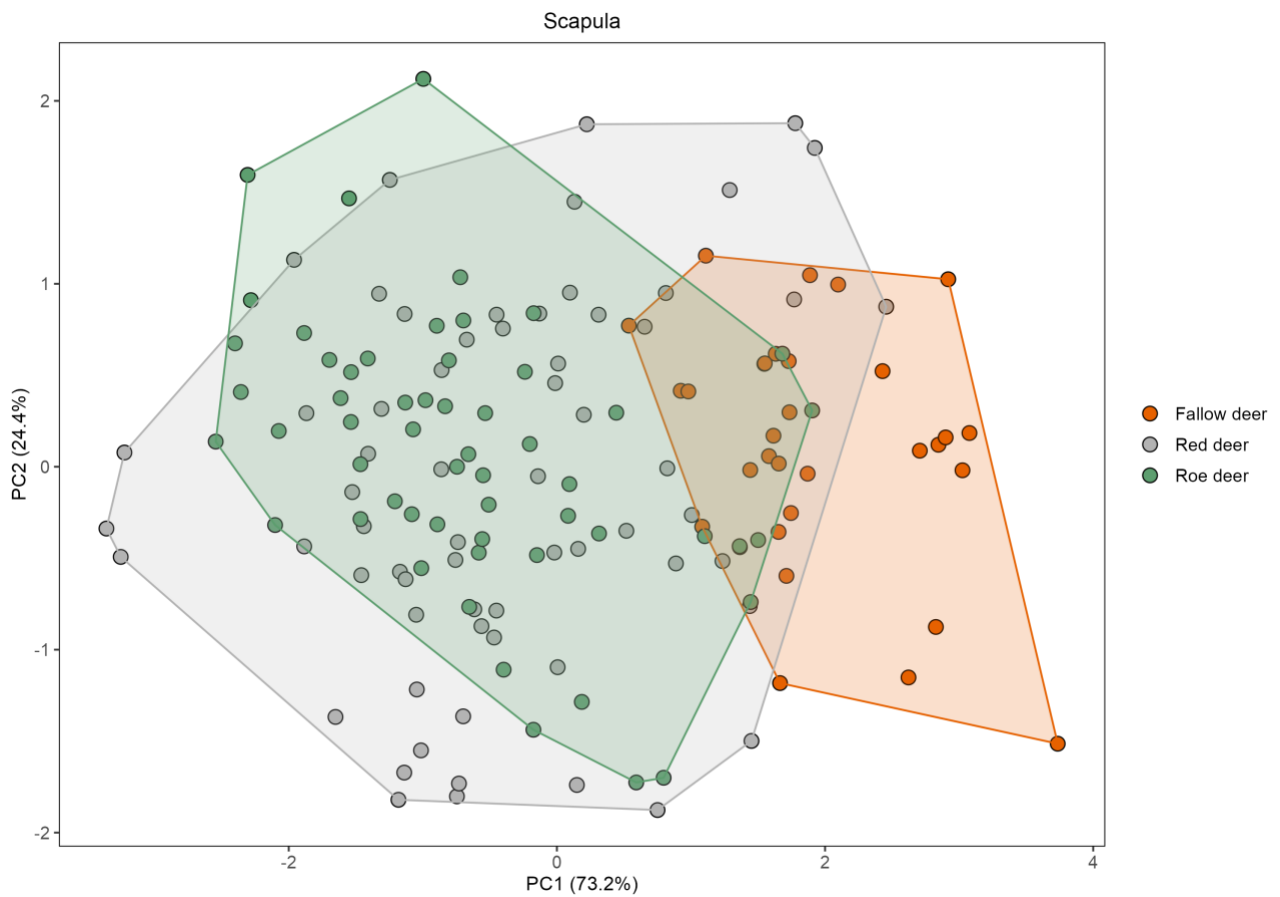

Fig 1. Graph of the results of the Principal Component Analysis (PCA) run on shape indices of the scapula.

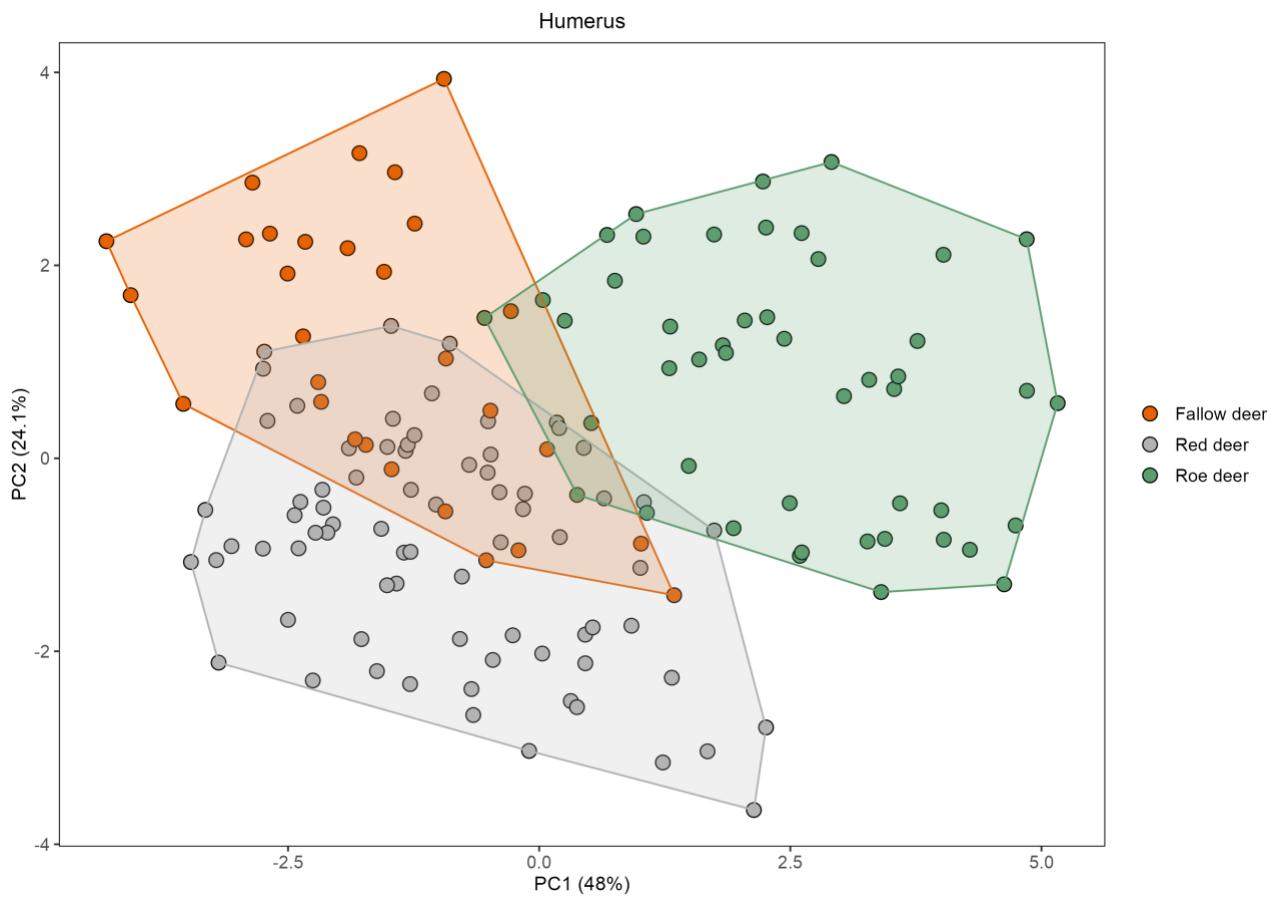

Fig 2. Graph of the results of the Principal Component Analysis (PCA) run on shape indices of the distal humerus.

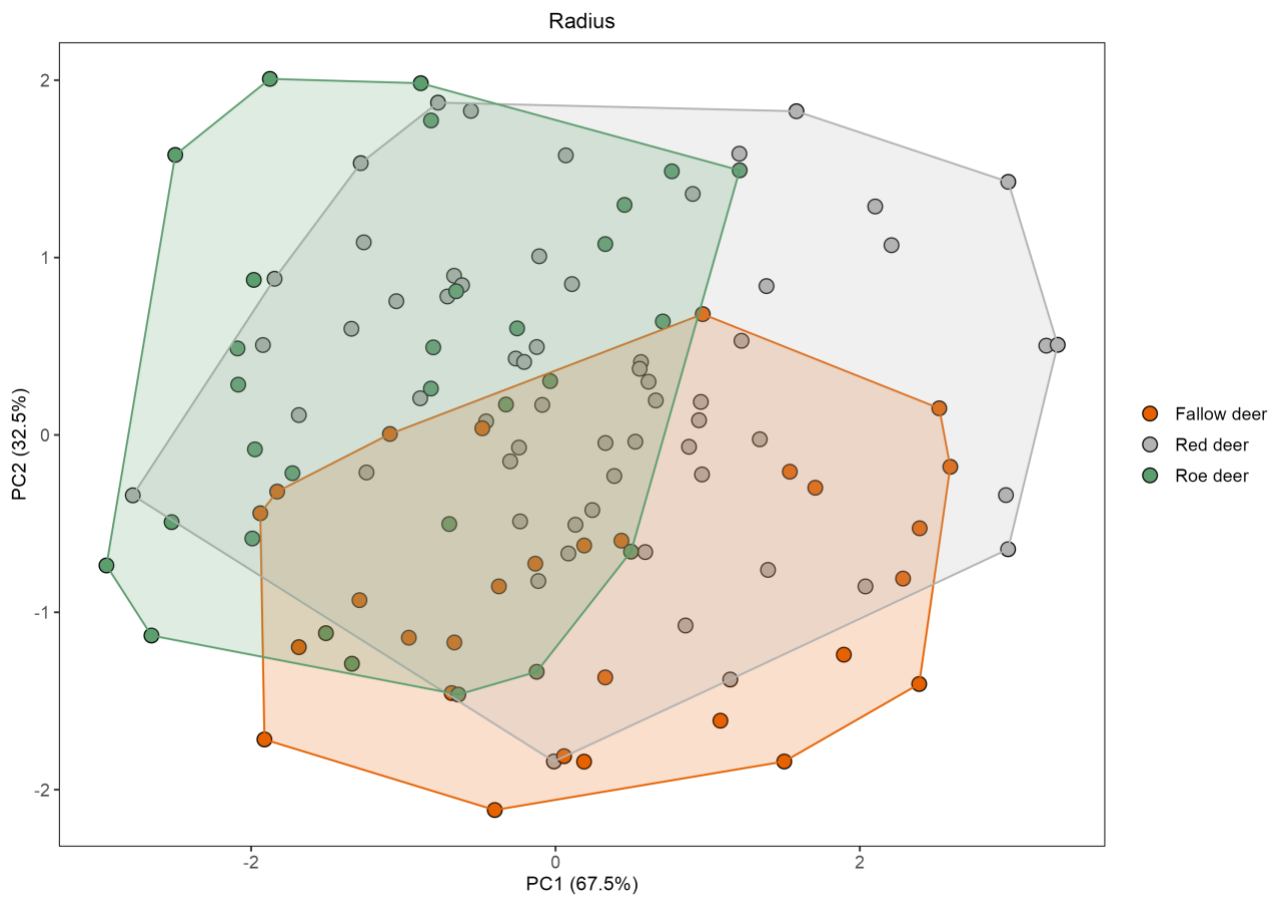

Fig 3. Graph of the results of the Principal Component Analysis (PCA) run on shape indices of the proximal radius (all shape indices, except those using measurement V, which is only taken on fallow deer and red deer).

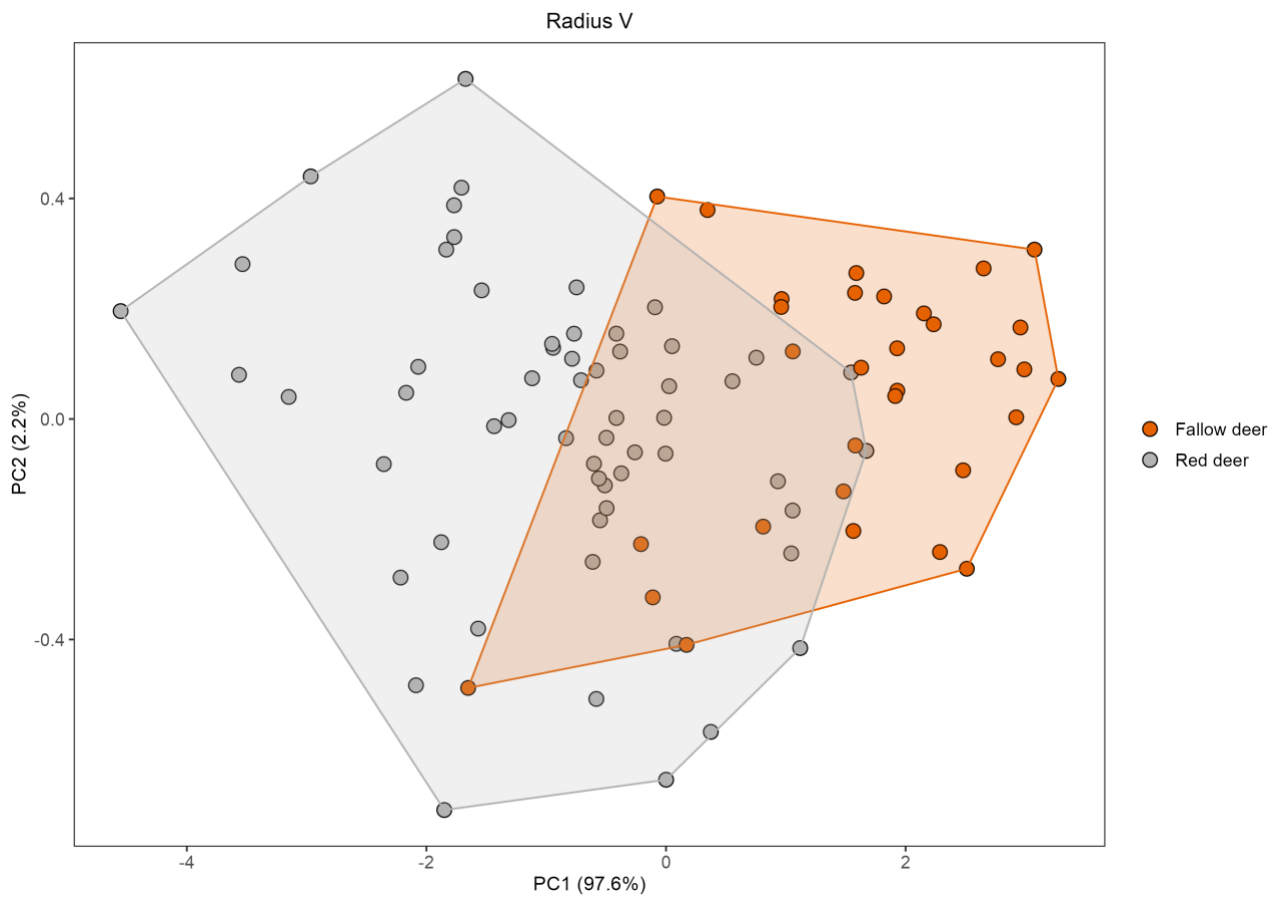

Fig 4. Graph of the results of the Principal Component Analysis (PCA) run on shape indices of the proximal radius (all shape indices, including those using measurement V, which is only taken on fallow deer and red deer).

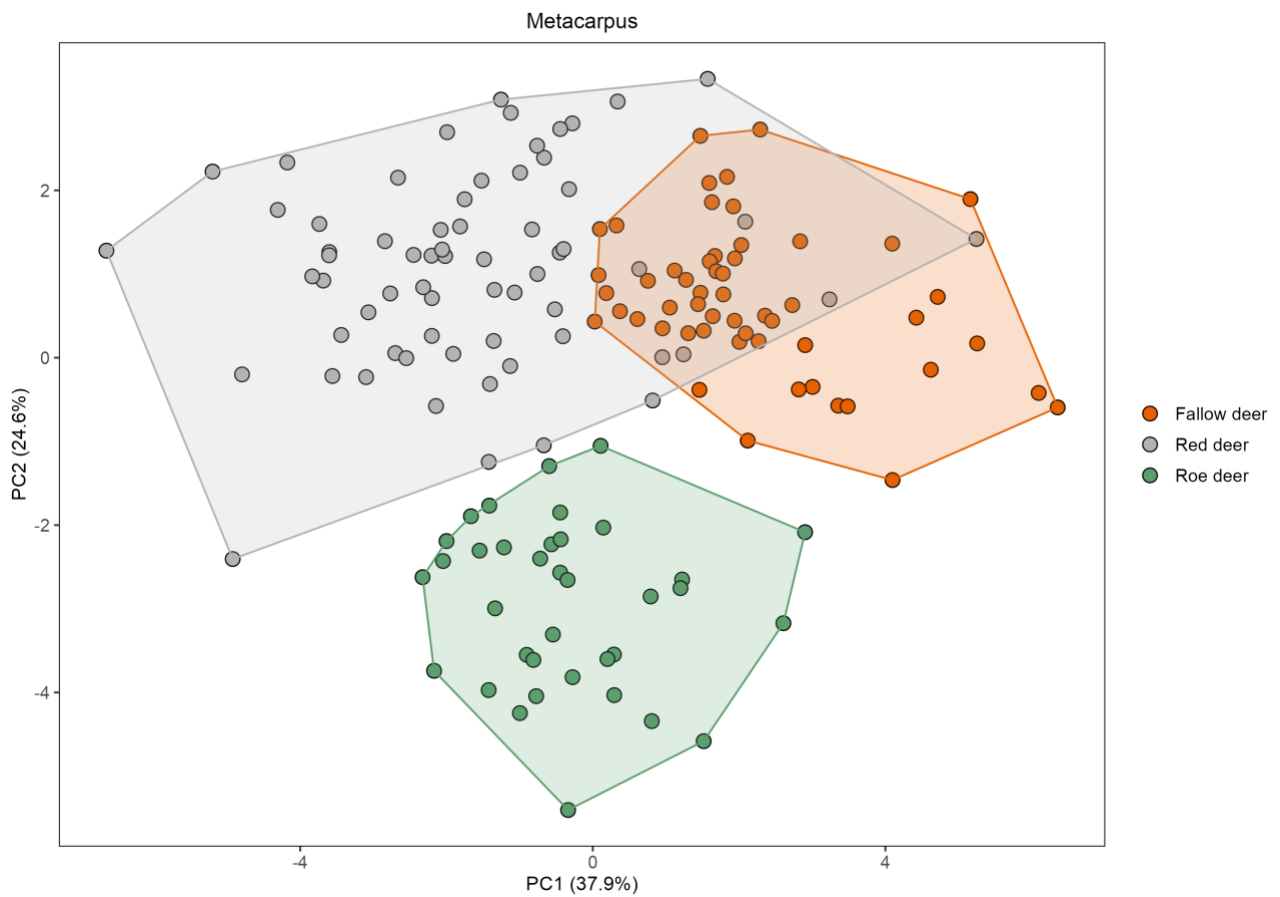

Fig 5. Graph of the results of the Principal Component Analysis (PCA) run on shape indices of the distal metacarpus.

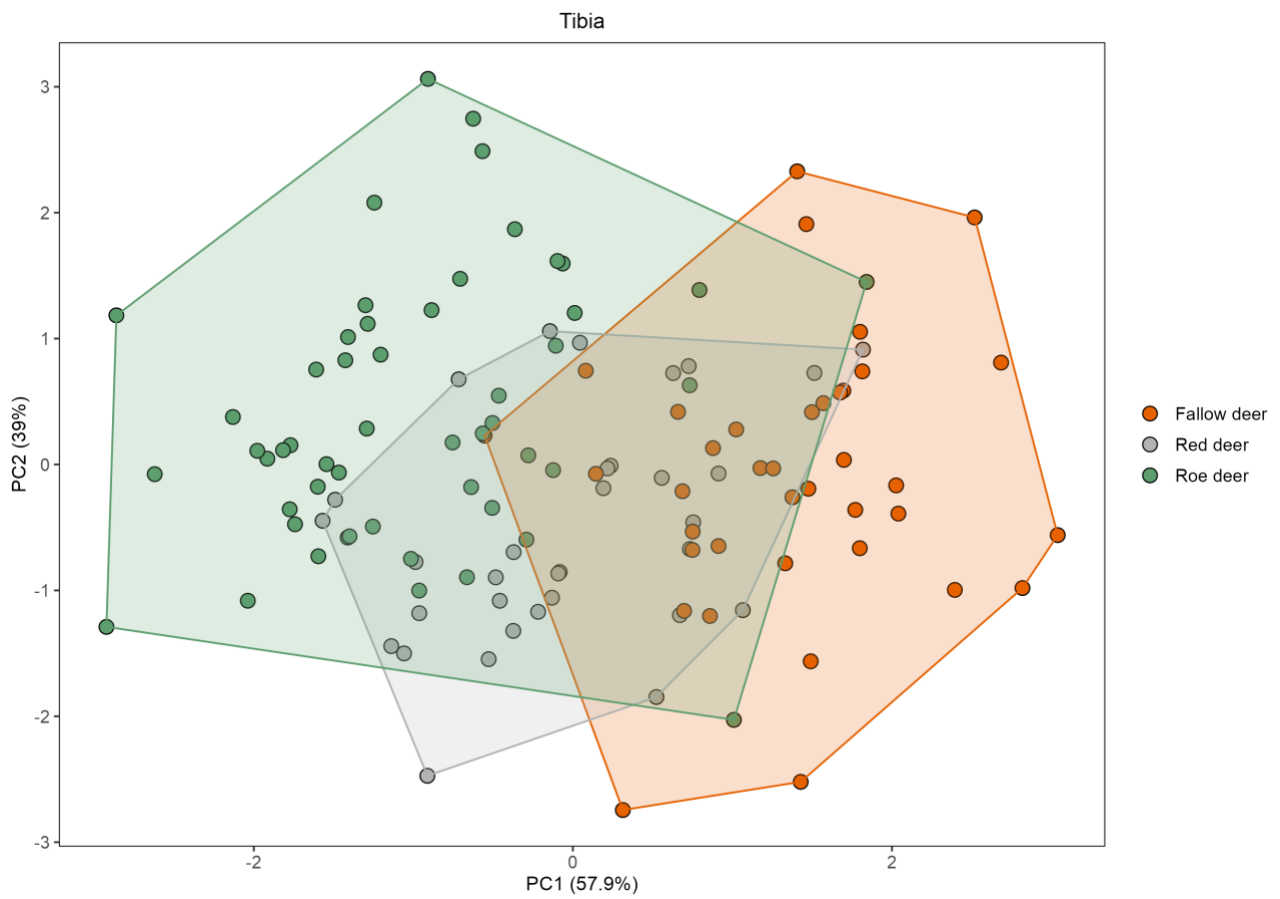

Fig 6. Graph of the results of the Principal Component Analysis (PCA) run on shape indices of the distal tibia.



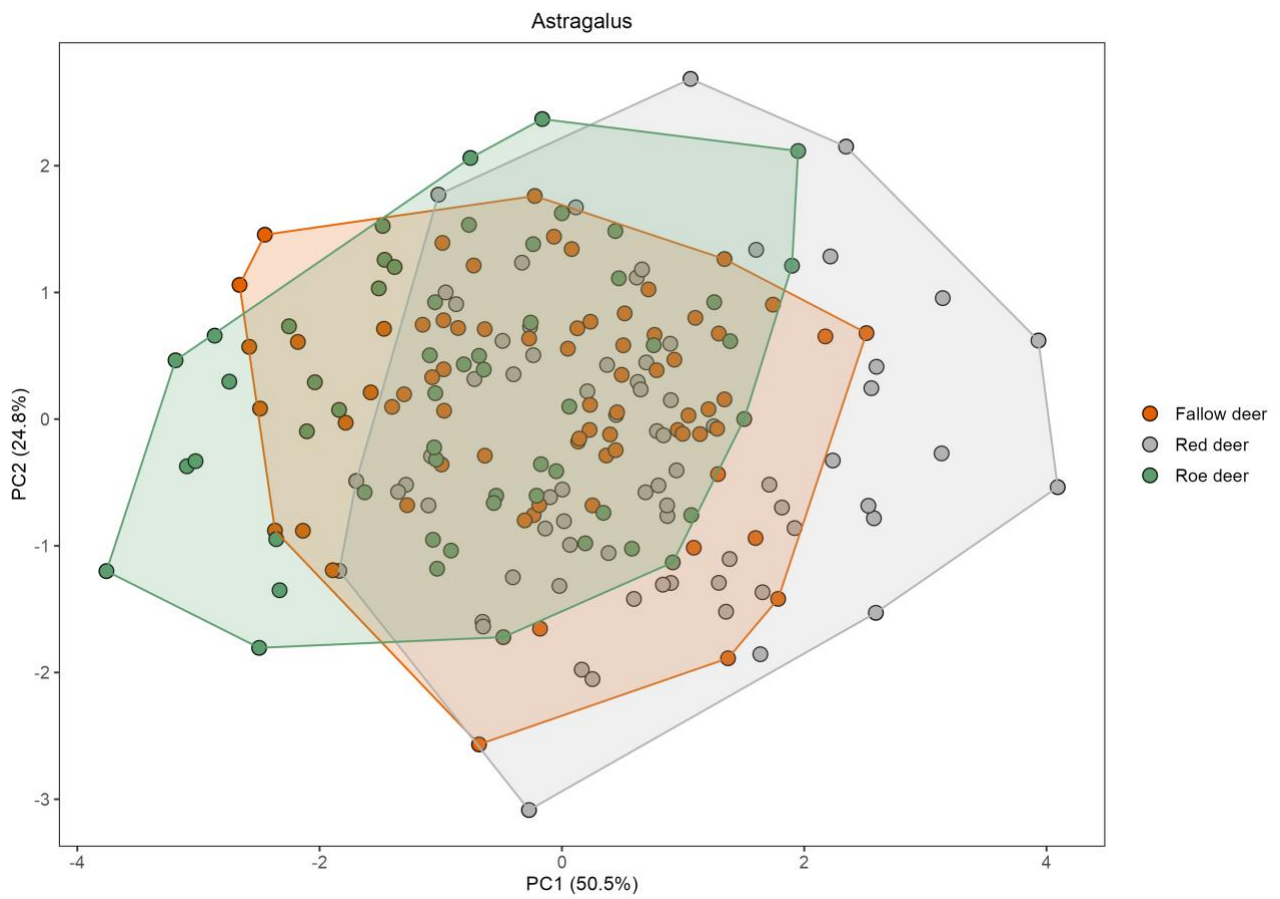

Fig 7. Graph of the results of the Principal Component Analysis (PCA) run on shape indices of the astragalus.

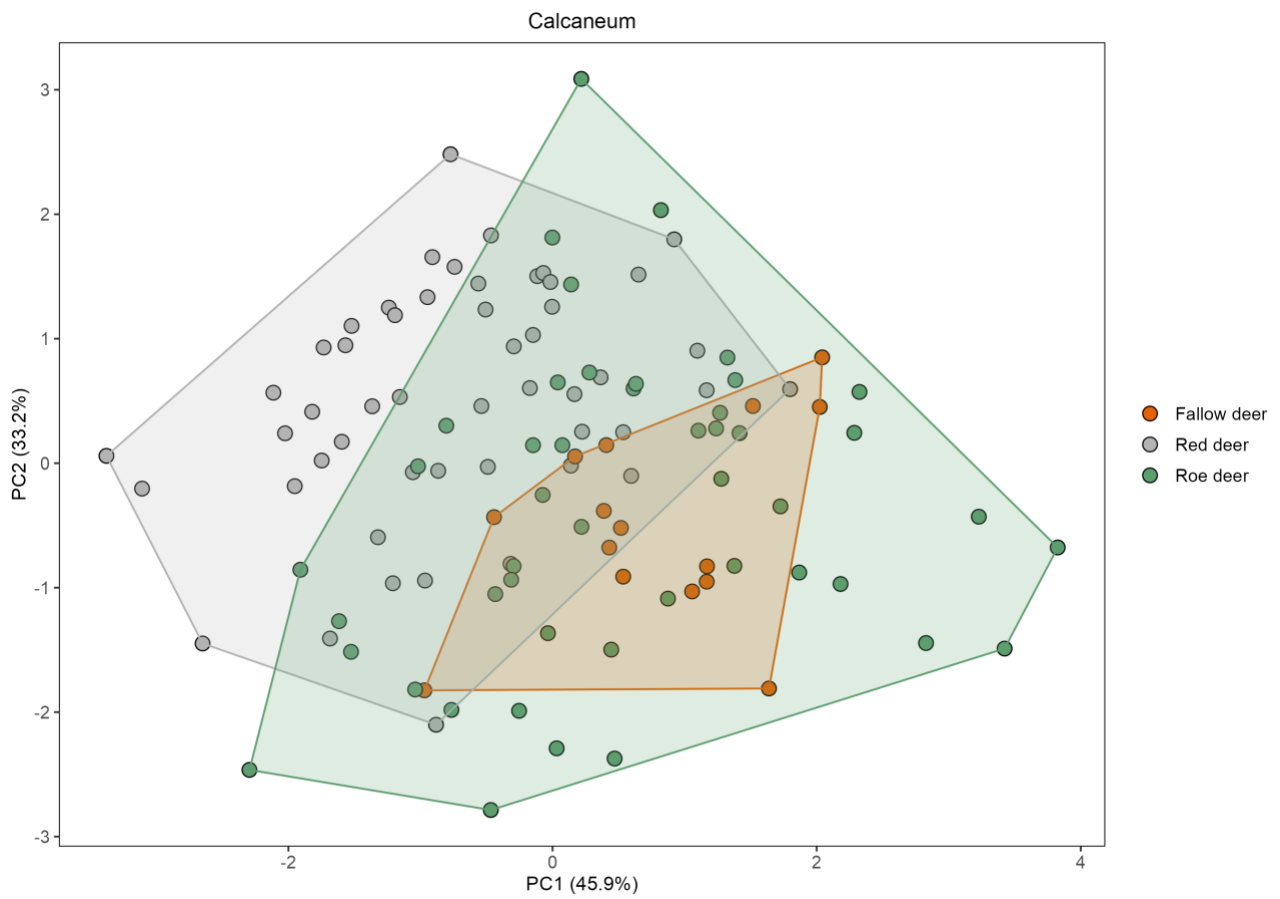

Fig 8. Graph of the results of the Principal Component Analysis (PCA) run on shape indices of the calcaneum of mature specimens.

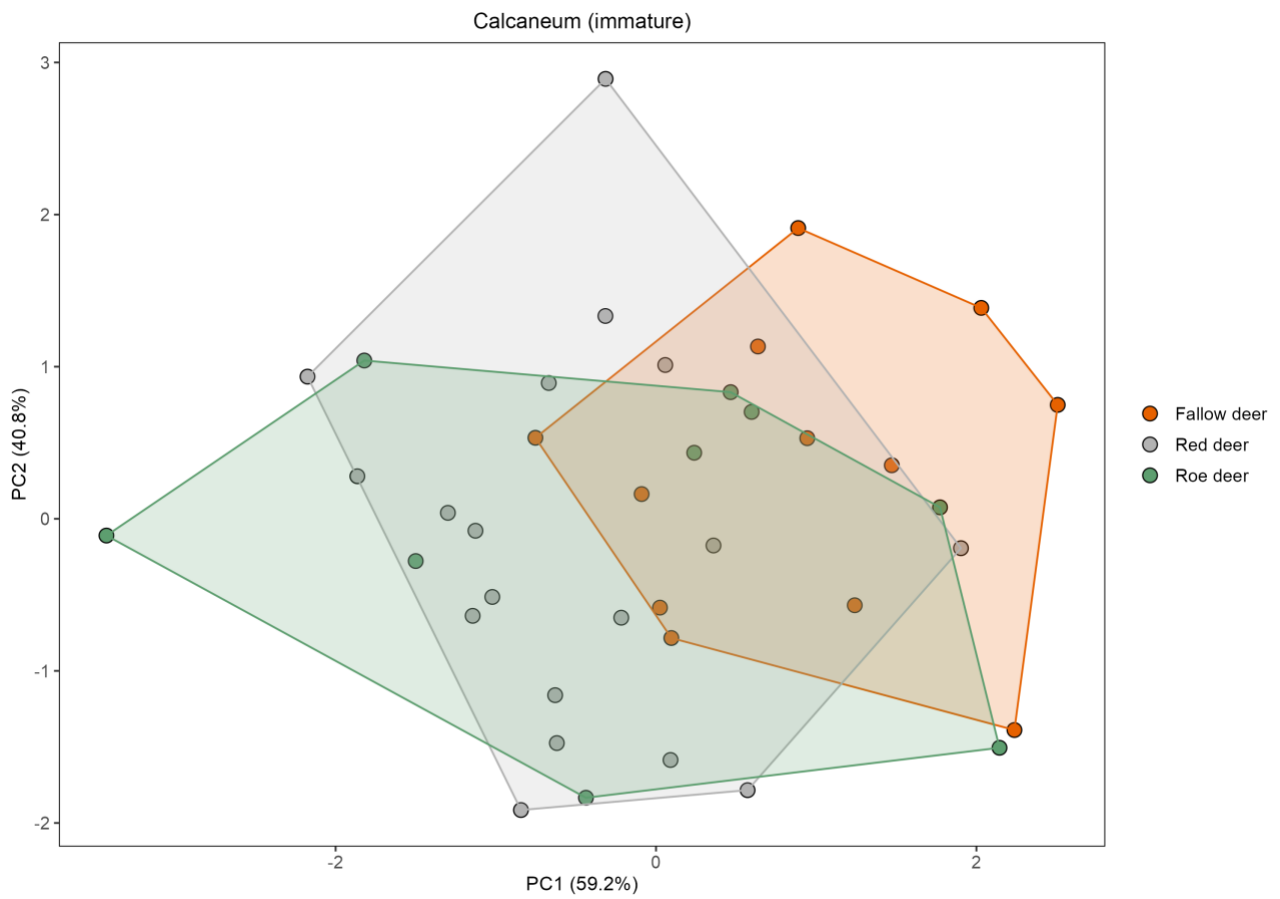

Fig 9. Graph of the results of the Principal Component Analysis (PCA) run on shape indices of the calcaneum of immature specimens.

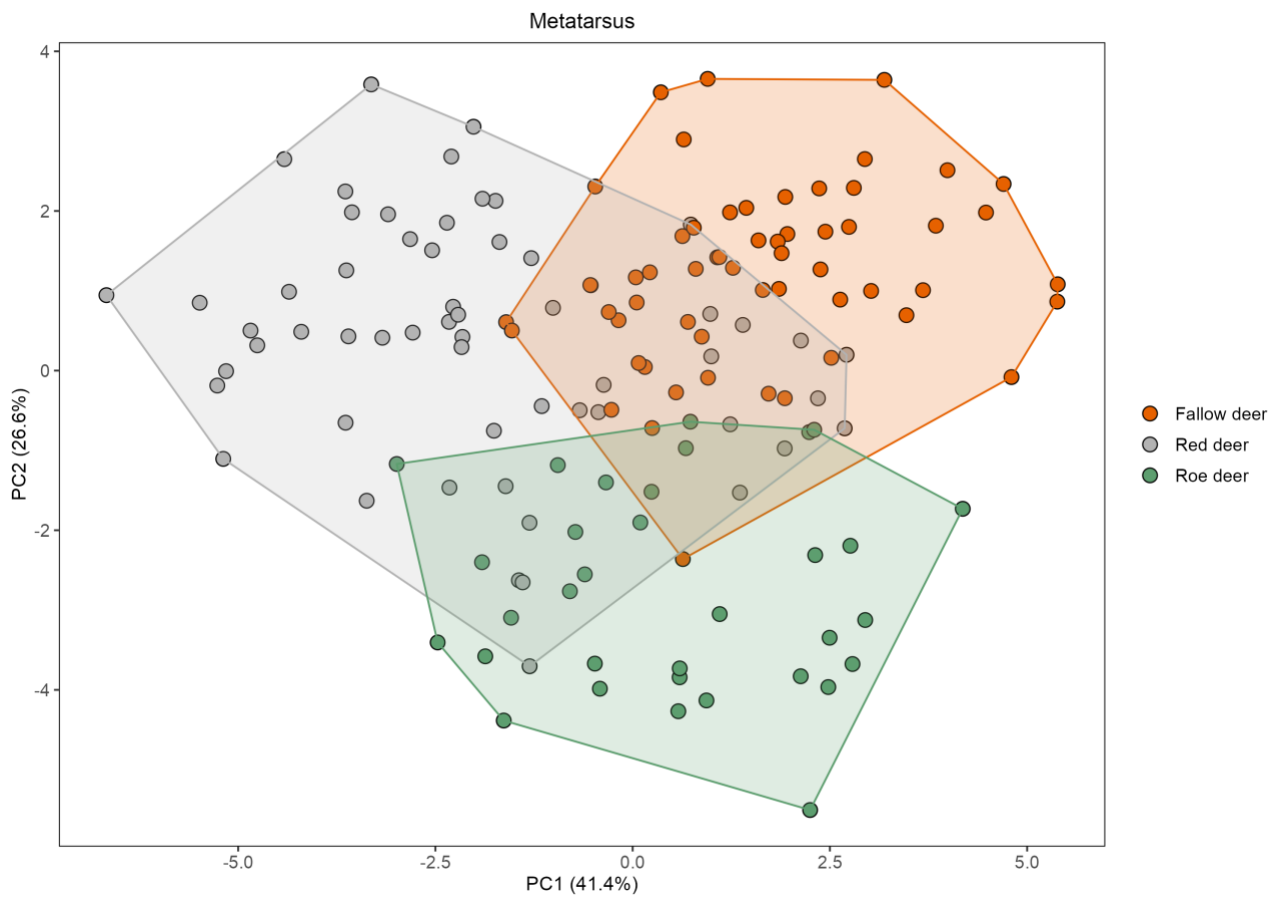

Fig 10. Graph of the results of the Principal Component Analysis (PCA) run on shape indices of the distal metatarsus.
