# Supplementary material for: ‘Cervified’: a method for the morphometric identification of red deer (Cervus elaphus), fallow deer (Dama dama), and roe deer (Capreolus capreolus) archaeological bones
Source: Research Square preprint supplement (doi:10.21203/rs.3.rs-6636241/v1), 2025-05-16
Supplement: Supplementary file 1 [file 14ceb2d6c1476202c71c0e5d.docx]

| **Mann-Whitney U test: *p*-values** | |  |
| --- | --- | --- |
| Shape index | Fallow-red deer | Fallow-roe deer |
| SD/GL | 0.206 | <0.001 |
| SD1/GL | 0.822 | <0.001 |
| BFp/GL | 0.047 | <0.001 |
| SD1/SD | 0.347 | <0.001 |
| SD1/SD-IM. | 0.853 | 0.654 |
| SD1/Bp | 0.463 | <0.001 |
| SD1/BFp | 0.018 | <0.001 |
| BFp/Bp | <0.001 | <0.001 |
| Dp/Bp | 0.552 | <0.001 |
| Dp/BFp | 0.003 | <0.001 |
| V/Bp | <0.001 | - |
| V/BFp | <0.001 | - |
| V/Dp | <0.001 | - |
