# Supplementary material for: ‘Cervified’: a method for the morphometric identification of red deer (Cervus elaphus), fallow deer (Dama dama), and roe deer (Capreolus capreolus) archaeological bones
Source: Research Square preprint supplement (doi:10.21203/rs.3.rs-6636241/v1), 2025-05-16
Supplement: Supplementary file 3 [file 2483f311349b0d49fc3885f8.docx]

| **Mann-Whitney U test: *p*-values** | |  |  |  | |  | |
| --- | --- | --- | --- | --- | --- | --- | --- |
| Shape index | Fallow-red deer | Fallow-roe deer | Shape index | | Fallow-red deer | | Fallow-roe deer |
| SD/GLC | <0.001 | <0.001 | SD/HTC | | <0.001 | | <0.001 |
| SD1/GLC | 0.021 | <0.001 | SD1/HTC | | 0.606 | | <0.001 |
| BT/GLC | 0.003 | <0.001 | BT/Bd | | <0.001 | | 0.014 |
| Bd/GLC | 0.714 | <0.001 | HTC/BT | | 0.019 | | <0.001 |
| HTC/GLC | 0.443 | <0.001 | HX/BT | | 0.738 | | <0.001 |
| HTL/GLC | <0.001 | <0.001 | HTL/BT | | 0.001 | | <0.001 |
| SD1/SD | <0.001 | 0.146 | HTC/Bd | | 0.026 | | <0.001 |
| SD1/SD-IM. | <0.001 | 0.014 | HX/Bd | | <0.001 | | <0.001 |
| SD/BT | <0.001 | <0.001 | HTL/Bd | | <0.001 | | <0.001 |
| SD1/BT | 0.417 | 0.015 | HTC/HX | | 0.005 | | <0.001 |
| SD/Bd | <0.001 | <0.001 | HTL/HTC | | <0.001 | | 0.013 |
| SD1/Bd | 0.092 | <0.001 | HTL/HC | | <0.001 | | <0.001 |
