# Supplementary material for: ‘Cervified’: a method for the morphometric identification of red deer (Cervus elaphus), fallow deer (Dama dama), and roe deer (Capreolus capreolus) archaeological bones
Source: Research Square preprint supplement (doi:10.21203/rs.3.rs-6636241/v1), 2025-05-16
Supplement: Supplementary file 4 [file 384e92538334ba91426d5888.docx]

| **Element** | **Measurement** | **Description** | **Reference(s)** |
| --- | --- | --- | --- |
| scapula | SLC | Smallest length of the *collum scapulae* (neck) | von den Driesch, 1976 |
|  | GLP | Greatest length of the *processus articularis* | von den Driesch, 1976 |
|  | LG  BG | Length of the glenoid cavity  Breadth of the glenoid cavity | von den Driesch, 1976  von den Driesch, 1976 |
|  | ASG | Shortest distance from the base of the spine to edge of glenoid cavity | Salvagno & Albarella, 2017, adapted from Fernández, 2001’s DEB |
| humerus | GLC | Greatest length from the *caput* (head) | von den Driesch, 1976 |
|  | *SD* | Smallest breadth of the diaphysis | von den Driesch, 1976 |
| **+** | *SD1* | Smallest depth of the diaphysis | S1 Fig 1 |
|  | BT | Greatest breadth of the trochlea | von den Driesch, 1976 |
|  | Bd | Greatest breadth of the distal end | von den Driesch, 1976 |
|  | HTC | Vertical/smallest diameter of the trochlea at its central constriction | Payne & Bull, 1988 |
| **+** | HX | Lateral height of the trochlea | S1 Fig 2 |
| **+** | HTL | Vertical/smallest diameter of the capitulum at its constriction | S1 Fig 2 |
| radius | GL | Greatest length | von den Driesch, 1976 |
|  | *SD* | Smallest breadth of the diaphysis | von den Driesch, 1976 |
| **+** | *SD1* | Smallest depth of the diaphysis (only when the ulna is not attached to the radius) | S1 Fig 3 |
|  | Bp | Greatest breadth of the proximal end | von den Driesch, 1976 |
|  | BFp | Greatest breadth of the *facies articularis proximalis* | von den Driesch, 1976 |
|  | Dp | Greatest depth of the proximal end (only when the ulna is not attached to the radius) | Salvagno & Albarella, 2017, adapted from Fernández, 2001’s DAPpA-DAPpM |
| **+** | V | Medial height of the insertion for the lateral ulnar articulation for the radius (red deer and fallow deer only; only when the ulna is not attached to the radius; taken with the caliper upper jaws) | S1 Fig 4 |
| tibia | GL | Greatest length | von den Driesch, 1976 |
|  | *SD* | Smallest breadth of the diaphysis | von den Driesch, 1976 |
| **+** | *SD1* | Smallest depth of the diaphysis | S1 Fig 5 |
|  | Bd | Greatest breadth of the distal end | von den Driesch, 1976 |
|  | Dda | Depth of the distal end on the medial side | Salvagno & Albarella, 2017, renamed after von den Driesch, 1976 |
|  | Ddb | Depth of the distal end on the lateral side | Salvagno & Albarella, 2017 |
| astragalus | GLl | Greatest length of the lateral half | von den Driesch, 1976 |
|  | GLm | Greatest length of the medial half | von den Driesch, 1976 |
|  | H | Height of the central constriction (i.e., minimum length) | Salvagno & Albarella, 2017 |
|  | Dl | Greatest depth of the lateral half | von den Driesch, 1976 |
|  | Bd | Greatest breadth of the distal end | von den Driesch, 1976 |
| calcaneum | *c* | Length of the articular facet of the *os malleolare* | Fernández, 2001 |
|  | *d* | Length from the distal end of the articular facet of the *os malleolare* to the end of the proximal end of the calcaneum. Adapted from S&A, where the measurement is taken from where the articular facet starts projecting out | adapted from Salvagno & Albarella, 2017 |
|  | *B* | Breadth of the articular surface of the *os malleolare* | Boessneck, 1964 |
| **+** | Bd | Greatest breadth of the distal end | S1 Fig 6 |
| **+** | Dd | Greatest depth of the distal end, taken with the caliper jaws parallel to the dorsal crest | S1 Fig 7 |
| metapodials | GL | Greatest length | von den Driesch, 1976 |
|  | *Bp* | Greatest breadth of the proximal end | von den Driesch, 1976 |
|  | *Dp* | Greatest depth of the proximal end | von den Driesch, 1976 |
|  | *SD* | Smallest breadth of the diaphysis | von den Driesch, 1976 |
| **+** | *SD1* | Smallest depth of the diaphysis | S1 Fig 8 |
|  | BFd | Breadth of the distal articular facet | Davis, 1996 |
|  | a or WCM | Medio-lateral width of the medial condyle taken in the middle | Payne, 1969; Davis, 1996 |
|  | b or WCL | Medio-lateral width of the lateral condyle taken in the middle | Payne, 1969; Davis, 1996 |
|  | 1 or DEM | Antero-posterior diameter of the external trochlea of the medial condyle, taken at its constriction | Payne, 1969; Davis, 1996 |
|  | 2 or DVM | Antero-posterior diameter of the verticillus of the medial condyle | Davis, 1996 |
|  | 3 or DIM | Antero-posterior diameter of the internal trochlea of the medial condyle | Davis, 1996 |
|  | 4 or DEL | Antero-posterior diameter of the external trochlea of the lateral condyle, taken at its constriction | Payne, 1969; Davis, 1996 |
|  | 5 or DVL | Antero-posterior diameter of the verticillus of the lateral condyle | Davis, 1996 |
|  | 6 or DIL | Antero-posterior diameter of the internal trochlea of the lateral condyle | Davis, 1996 |
