# Supplementary material for: ‘Cervified’: a method for the morphometric identification of red deer (Cervus elaphus), fallow deer (Dama dama), and roe deer (Capreolus capreolus) archaeological bones
Source: Research Square preprint supplement (doi:10.21203/rs.3.rs-6636241/v1), 2025-05-16
Supplement: Supplementary file 6 [file 5405246dcbccdb7a6f0095bf.docx]

| **Mann-Whitney U test: *p*-values** | |  |
| --- | --- | --- |
| Shape index | Fallow-red deer | Fallow-roe deer |
| ASG/LG | <0.001 | <0.001 |
| ASG/GLP | <0.001 | <0.001 |
| SLC/GLP | <0.001 | <0.001 |
