# Supplementary material for: ‘Cervified’: a method for the morphometric identification of red deer (Cervus elaphus), fallow deer (Dama dama), and roe deer (Capreolus capreolus) archaeological bones
Source: Research Square preprint supplement (doi:10.21203/rs.3.rs-6636241/v1), 2025-05-16
Supplement: Supplementary file 7 [file a1d00eb2b5235a9b4045788b.docx]

| **Mann-Whitney U test: *p*-values** | |  |  |  |  |
| --- | --- | --- | --- | --- | --- |
| Shape index | Fallow-red deer | Fallow-roe deer | Shape index | Fallow-red deer | Fallow-roe deer |
| SD/GL | 0.915 | <0.001 | a/2 | <0.001 | <0.001 |
| SD1/GL | <0.001 | <0.001 | a/3 | <0.001 | 0.936 |
| BFd/GL | 0.310 | <0.001 | 1/2 | 0.007 | <0.001 |
| Bp/Dp | 0.078 | <0.001 | 1/3 | 0.018 | 0.007 |
| SD1/SD | <0.001 | <0.001 | 3/2 | 0.468 | <0.001 |
| SD1/SD-IM. | <0.001 | 0.013 | b/4 | <0.001 | 0.942 |
| SD/BFd | 0.222 | <0.001 | b/5 | <0.001 | <0.001 |
| SD1/BFd | <0.001 | 0.525 | b/6 | <0.001 | 0.438 |
| b/a | <0.001 | 0.192 | 4/5 | <0.001 | <0.001 |
| a/BFd | 0.007 | <0.001 | 4/6 | <0.001 | 0.778 |
| b/BFd | <0.001 | <0.001 | 6/5 | 0.745 | <0.001 |
| a/1 | <0.001 | 0.035 |  |  |  |
