# Supplementary material for: ‘Cervified’: a method for the morphometric identification of red deer (Cervus elaphus), fallow deer (Dama dama), and roe deer (Capreolus capreolus) archaeological bones
Source: Research Square preprint supplement (doi:10.21203/rs.3.rs-6636241/v1), 2025-05-16
Supplement: Supplementary file 8 [file d3b5353d8bfa31a64d65de58.docx]

| **Mann-Whitney U test: *p*-values** | |  |
| --- | --- | --- |
| Shape index | Fallow-red deer | Fallow-roe deer |
| Bd/Dd | <0.001 | <0.001 |
| c/d | <0.001 | 0.704 |
| B/c | <0.001 | 0.061 |
| B/d | <0.001 | 0.289 |
| c/d-IM. | 0.066 | 0.317 |
| B/c-IM. | <0.001 | 0.062 |
| B/d-IM. | 0.005 | 0.181 |
