# Supplementary material for: ‘Cervified’: a method for the morphometric identification of red deer (Cervus elaphus), fallow deer (Dama dama), and roe deer (Capreolus capreolus) archaeological bones
Source: Research Square preprint supplement (doi:10.21203/rs.3.rs-6636241/v1), 2025-05-16
Supplement: Supplementary file 9 [file eccabc0c99eec24dfa642f8d.docx]

| **Country** | **Institution** | **Red deer** | **Fallow deer** | **Roe deer** |
| --- | --- | --- | --- | --- |
| Austria | Natural History Museum, Wien | 23 | 14 | 16 |
| Greece | Malcolm H. Wiener Laboratory for Archaeological Science, ASCSA* | 1 | 3 | 3 |
| Hungary | Hungarian Natural History Museum, Budapest | 11 | 24 | 4 |
| Italy | Department of Physical Sciences, Earth and Environment, Siena  Natural History Museum, Venice | 7  3 | 19  2 | 6  5 |
| Norway | Department of Natural History-University Museum, Bergen | 24 | - | 6 |
| UK | Department of Archaeology, Sheffield  Historic England, Portsmouth  Sheila Hamilton Dyer’s reference collection, Southampton | 12  30  4 | 10  17  5 | 14  24  10 |
| **Total** |  | **115** | **94** | **88** |
