# Supplementary material for: ‘Cervified’: a method for the morphometric identification of red deer (Cervus elaphus), fallow deer (Dama dama), and roe deer (Capreolus capreolus) archaeological bones
Source: Research Square preprint supplement (doi:10.21203/rs.3.rs-6636241/v1), 2025-05-16
Supplement: Supplementary file 10 [file fbd62ab029dc82202df626c3.docx]

| **Mann-Whitney U test: *p*-values** | |  |
| --- | --- | --- |
| Shape index | Fallow-red deer | Fallow-roe deer |
| GLm/GLl | <0.001 | 0.734 |
| Bd/H | 0.036 | 0.689 |
| Dl/GLl | 0.013 | <0.001 |
| Dl/H | 0.365 | 0.017 |
